# Supplementary material for: Computational study on catalyst-free BCl3-promoted chloroboration of carbonyl compounds
Source: Royal Society of Chemistry journal article supplement (doi:10.1039/d4ra06893a), 2025-01-01
Supplement: d4ra06893a1.pdf [file d4ra06893a1.pdf]

**Journal Name: RSC Advances**

**Supplementary Material**

**Computational study on catalyst-free BCl<sub>3</sub> promoted chloroboration of carbonyl compounds**

Abera Tadie Derese<sup>\*a</sup>, Mengistu Gemech Menkir<sup>b</sup>, Mihret Kindie Wolie<sup>c</sup>, and Desalegn Addis Yemam<sup>d</sup>

<sup>a,d</sup>Department of Chemistry, Debre Tabor University, Ethiopia

<sup>b</sup>Department of Chemistry, Bahir Dar University, Ethiopia

<sup>c</sup>Department of Chemistry, Debark University, Ethiopia

\*corresponding author email: [aberatadie@gmail.com](mailto:aberatadie@gmail.com)

Cartesian coordinates (Å) for optimized structures of model substrates for both aldehydes and ketones in toluene at M062X/6-311++G(d,p) level with PCM model. The coordinates of the optimized structures in gas phase are not included.

### A-Ts1

Center Atomic Atomic Coordinates (Angstroms)

Number Number Type X Y Z

---

|    |    |   |           |          |           |
|----|----|---|-----------|----------|-----------|
| 1  | 6  | 0 | -2.506166 | 2.586841 | 0.593865  |
| 2  | 6  | 0 | -1.341787 | 2.775833 | -0.147795 |
| 3  | 6  | 0 | -0.192609 | 3.229659 | 0.487198  |
| 4  | 6  | 0 | -0.212926 | 3.508773 | 1.857545  |
| 5  | 6  | 0 | -1.381489 | 3.308737 | 2.601460  |
| 6  | 6  | 0 | -2.524922 | 2.846294 | 1.965165  |
| 7  | 1  | 0 | -3.405407 | 2.228120 | 0.102063  |
| 8  | 1  | 0 | -1.331599 | 2.566319 | -1.212250 |
| 9  | 1  | 0 | 0.725659  | 3.376920 | -0.076646 |
| 10 | 1  | 0 | -1.378549 | 3.500267 | 3.668910  |
| 11 | 1  | 0 | -3.433728 | 2.684902 | 2.535547  |
| 12 | 6  | 0 | 1.027376  | 3.994852 | 2.476206  |
| 13 | 8  | 0 | 1.159851  | 4.434502 | 3.605659  |
| 14 | 5  | 0 | 0.113890  | 5.474694 | 5.193498  |
| 15 | 17 | 0 | 1.535678  | 6.358017 | 5.735448  |

|    |    |   |           |          |          |
|----|----|---|-----------|----------|----------|
| 16 | 17 | 0 | -1.077788 | 6.322535 | 4.195107 |
| 17 | 17 | 0 | -0.413647 | 4.064551 | 6.125497 |
| 18 | 1  | 0 | 1.923267  | 3.943514 | 1.830410 |

**A-Intr1**

| Center | Atomic | Atomic | Coordinates (Angstroms) |           |           |
|--------|--------|--------|-------------------------|-----------|-----------|
| Number | Number | Type   | X                       | Y         | Z         |
| -----  |        |        |                         |           |           |
| 1      | 6      | 0      | -2.113116               | -2.038323 | -2.966902 |
| 2      | 6      | 0      | -0.872263               | -1.936553 | -3.595272 |
| 3      | 6      | 0      | 0.174863                | -1.324218 | -2.927810 |
| 4      | 6      | 0      | -0.005324               | -0.808440 | -1.627987 |
| 5      | 6      | 0      | -1.263355               | -0.916640 | -1.003049 |
| 6      | 6      | 0      | -2.304804               | -1.531139 | -1.681011 |
| 7      | 1      | 0      | -2.938974               | -2.518079 | -3.483461 |
| 8      | 1      | 0      | -0.727652               | -2.332911 | -4.594159 |
| 9      | 1      | 0      | 1.146562                | -1.238631 | -3.407384 |
| 10     | 1      | 0      | -1.423414               | -0.527096 | -0.008155 |
| 11     | 1      | 0      | -3.274485               | -1.616617 | -1.203039 |
| 12     | 6      | 0      | 1.182792                | -0.204277 | -1.071182 |
| 13     | 8      | 0      | 1.419931                | 0.341264  | 0.021599  |
| 14     | 5      | 0      | 0.646660                | 0.675556  | 1.342712  |

|    |    |   |           |           |           |
|----|----|---|-----------|-----------|-----------|
| 15 | 17 | 0 | 1.892274  | 1.495198  | 2.378237  |
| 16 | 17 | 0 | -0.730015 | 1.798382  | 0.869972  |
| 17 | 17 | 0 | 0.094148  | -0.931238 | 2.044098  |
| 18 | 1  | 0 | 2.057648  | -0.223404 | -1.730603 |

**A-Ts2**

| Center | Atomic | Atomic | Coordinates (Angstroms) |  |  |
|--------|--------|--------|-------------------------|--|--|
|--------|--------|--------|-------------------------|--|--|

| Number | Number | Type | X | Y | Z |
|--------|--------|------|---|---|---|
|--------|--------|------|---|---|---|

-----

|    |   |   |           |           |           |
|----|---|---|-----------|-----------|-----------|
| 1  | 6 | 0 | -2.005855 | -2.439896 | -3.105570 |
| 2  | 6 | 0 | -0.793897 | -2.071147 | -3.689014 |
| 3  | 6 | 0 | 0.074596  | -1.237990 | -2.997965 |
| 4  | 6 | 0 | -0.275124 | -0.779068 | -1.723511 |
| 5  | 6 | 0 | -1.494067 | -1.143363 | -1.139929 |
| 6  | 6 | 0 | -2.355793 | -1.979331 | -1.835248 |
| 7  | 1 | 0 | -2.685233 | -3.091384 | -3.646823 |
| 8  | 1 | 0 | -0.530718 | -2.433538 | -4.676972 |
| 9  | 1 | 0 | 1.021377  | -0.936999 | -3.439320 |
| 10 | 1 | 0 | -1.741170 | -0.765899 | -0.152843 |
| 11 | 1 | 0 | -3.302099 | -2.272428 | -1.392904 |
| 12 | 6 | 0 | 0.648948  | 0.084048  | -1.003500 |
| 13 | 8 | 0 | 0.482013  | 0.226867  | 0.299212  |

|    |    |   |           |          |           |
|----|----|---|-----------|----------|-----------|
| 14 | 5  | 0 | 0.777409  | 1.619107 | 0.607280  |
| 15 | 17 | 0 | -0.344687 | 2.336933 | 1.788620  |
| 16 | 17 | 0 | 2.527448  | 1.998611 | 0.781881  |
| 17 | 17 | 0 | 0.226174  | 2.193448 | -1.359225 |
| 18 | 1  | 0 | 1.664615  | 0.183078 | -1.393923 |

### A-product

| Center | Atomic | Atomic | Coordinates (Angstroms) |           |           |
|--------|--------|--------|-------------------------|-----------|-----------|
| Number | Number | Type   | X                       | Y         | Z         |
| -----  |        |        |                         |           |           |
| 1      | 6      | 0      | -1.967403               | -3.119698 | -2.339198 |
| 2      | 6      | 0      | -0.712721               | -2.790242 | -2.844952 |
| 3      | 6      | 0      | 0.026396                | -1.769927 | -2.255341 |
| 4      | 6      | 0      | -0.489583               | -1.078253 | -1.161576 |
| 5      | 6      | 0      | -1.746413               | -1.404866 | -0.654672 |
| 6      | 6      | 0      | -2.481272               | -2.427866 | -1.244447 |
| 7      | 1      | 0      | -2.544084               | -3.917556 | -2.796779 |
| 8      | 1      | 0      | -0.307424               | -3.329120 | -3.695453 |
| 9      | 1      | 0      | 1.005552                | -1.506626 | -2.648214 |
| 10     | 1      | 0      | -2.137023               | -0.862515 | 0.200345  |
| 11     | 1      | 0      | -3.458349               | -2.685638 | -0.848054 |
| 12     | 6      | 0      | 0.313931                | 0.040643  | -0.567306 |

|    |    |   |           |           |           |
|----|----|---|-----------|-----------|-----------|
| 13 | 8  | 0 | 0.030883  | 0.162058  | 0.801772  |
| 14 | 5  | 0 | 0.848787  | 0.739858  | 1.700681  |
| 15 | 17 | 0 | 0.286245  | 0.844888  | 3.357012  |
| 16 | 17 | 0 | 2.443086  | 1.353507  | 1.271396  |
| 17 | 17 | 0 | -0.087668 | 1.613266  | -1.373298 |
| 18 | 1  | 0 | 1.384569  | -0.094119 | -0.731058 |

### K-Ts1

| Center | Atomic | Atomic | Coordinates (Angstroms) |          |           |
|--------|--------|--------|-------------------------|----------|-----------|
| Number | Number | Type   | X                       | Y        | Z         |
| -----  |        |        |                         |          |           |
| 1      | 6      | 0      | -2.555005               | 2.565649 | 0.496154  |
| 2      | 6      | 0      | -1.374560               | 2.631856 | -0.241249 |
| 3      | 6      | 0      | -0.201663               | 3.062401 | 0.367048  |
| 4      | 6      | 0      | -0.208188               | 3.447352 | 1.712613  |
| 5      | 6      | 0      | -1.396347               | 3.375603 | 2.447698  |
| 6      | 6      | 0      | -2.564212               | 2.932285 | 1.840769  |
| 7      | 1      | 0      | -3.469916               | 2.223260 | 0.022063  |
| 8      | 1      | 0      | -1.368318               | 2.345881 | -1.288083 |
| 9      | 1      | 0      | 0.715271                | 3.109221 | -0.212408 |
| 10     | 1      | 0      | -1.389399               | 3.655306 | 3.496207  |
| 11     | 1      | 0      | -3.482575               | 2.874182 | 2.415837  |

|    |    |   |           |          |          |
|----|----|---|-----------|----------|----------|
| 12 | 6  | 0 | 1.033069  | 3.913187 | 2.384517 |
| 13 | 8  | 0 | 1.010538  | 4.514721 | 3.450985 |
| 14 | 6  | 0 | 2.367534  | 3.625415 | 1.739112 |
| 15 | 1  | 0 | 2.446815  | 2.575964 | 1.442975 |
| 16 | 1  | 0 | 2.478064  | 4.237029 | 0.836601 |
| 17 | 1  | 0 | 3.159834  | 3.884406 | 2.440702 |
| 18 | 5  | 0 | -0.096938 | 6.053345 | 4.547632 |
| 19 | 17 | 0 | 1.348469  | 6.968854 | 4.960271 |
| 20 | 17 | 0 | -1.117008 | 6.634724 | 3.225885 |
| 21 | 17 | 0 | -0.815111 | 5.006213 | 5.778509 |

**K-Intr1**

| Center | Atomic | Atomic | Coordinates (Angstroms) |           |           |
|--------|--------|--------|-------------------------|-----------|-----------|
| Number | Number | Type   | X                       | Y         | Z         |
| -----  |        |        |                         |           |           |
| 1      | 6      | 0      | -2.246641               | -2.186794 | -2.574102 |
| 2      | 6      | 0      | -1.051280               | -2.044142 | -3.279577 |
| 3      | 6      | 0      | 0.074937                | -1.561841 | -2.632561 |
| 4      | 6      | 0      | 0.002490                | -1.179642 | -1.281548 |
| 5      | 6      | 0      | -1.203467               | -1.323602 | -0.579631 |
| 6      | 6      | 0      | -2.318100               | -1.838417 | -1.227565 |
| 7      | 1      | 0      | -3.125836               | -2.576665 | -3.078033 |

|    |    |   |           |           |           |
|----|----|---|-----------|-----------|-----------|
| 8  | 1  | 0 | -0.999915 | -2.314478 | -4.328764 |
| 9  | 1  | 0 | 1.003882  | -1.455396 | -3.183595 |
| 10 | 1  | 0 | -1.256143 | -1.061045 | 0.470603  |
| 11 | 1  | 0 | -3.246374 | -1.959928 | -0.680066 |
| 12 | 6  | 0 | 1.215087  | -0.700552 | -0.619874 |
| 13 | 8  | 0 | 1.253989  | 0.034813  | 0.390794  |
| 14 | 6  | 0 | 2.562449  | -1.104982 | -1.142549 |
| 15 | 1  | 0 | 2.574449  | -2.147132 | -1.465074 |
| 16 | 1  | 0 | 2.800642  | -0.474355 | -2.008226 |
| 17 | 1  | 0 | 3.312415  | -0.923837 | -0.373327 |
| 18 | 5  | 0 | 0.340736  | 1.048564  | 1.167234  |
| 19 | 17 | 0 | 1.535498  | 2.281519  | 1.780288  |
| 20 | 17 | 0 | -0.863225 | 1.779407  | -0.004960 |
| 21 | 17 | 0 | -0.436300 | 0.086666  | 2.527077  |

### K-Ts2

| Center | Atomic | Atomic | Coordinates (Angstroms) |           |           |
|--------|--------|--------|-------------------------|-----------|-----------|
| Number | Number | Type   | X                       | Y         | Z         |
| -----  |        |        |                         |           |           |
| 1      | 6      | 0      | -2.273559               | -2.301830 | -2.573352 |
| 2      | 6      | 0      | -1.061286               | -2.303941 | -3.260844 |
| 3      | 6      | 0      | 0.060011                | -1.714292 | -2.691691 |



|    |    |   |           |           |           |
|----|----|---|-----------|-----------|-----------|
| 4  | 6  | 0 | -0.028635 | -1.125360 | -1.425034 |
| 5  | 6  | 0 | -1.248976 | -1.123273 | -0.737611 |
| 6  | 6  | 0 | -2.366444 | -1.711237 | -1.313934 |
| 7  | 1  | 0 | -3.149153 | -2.761253 | -3.021639 |
| 8  | 1  | 0 | -0.989651 | -2.763865 | -4.240891 |
| 9  | 1  | 0 | 0.998383  | -1.717245 | -3.235781 |
| 10 | 1  | 0 | -1.304708 | -0.657064 | 0.240864  |
| 11 | 1  | 0 | -3.311517 | -1.708781 | -0.781113 |
| 12 | 6  | 0 | 1.146623  | -0.503757 | -0.783429 |
| 13 | 8  | 0 | 1.037017  | -0.323518 | 0.539890  |
| 14 | 6  | 0 | 2.532652  | -0.792126 | -1.282335 |
| 15 | 1  | 0 | 2.734634  | -1.845254 | -1.049653 |
| 16 | 1  | 0 | 2.629732  | -0.634486 | -2.356006 |
| 17 | 1  | 0 | 3.252564  | -0.170891 | -0.748635 |
| 18 | 5  | 0 | 1.159550  | 1.083162  | 0.845434  |
| 19 | 17 | 0 | 2.780341  | 1.622703  | 1.421277  |
| 20 | 17 | 0 | 0.985635  | 1.626475  | -1.168849 |
| 21 | 17 | 0 | -0.250440 | 1.741827  | 1.743774  |

### **K-product**

| Center | Atomic | Atomic | Coordinates (Angstroms) |   |   |
|--------|--------|--------|-------------------------|---|---|
| Number | Number | Type   | X                       | Y | Z |

-----

|    |    |   |           |           |           |
|----|----|---|-----------|-----------|-----------|
| 1  | 6  | 0 | -2.655643 | -2.580297 | -2.211463 |
| 2  | 6  | 0 | -1.544371 | -2.267782 | -2.993151 |
| 3  | 6  | 0 | -0.520991 | -1.489739 | -2.468811 |
| 4  | 6  | 0 | -0.597024 | -1.015409 | -1.156727 |
| 5  | 6  | 0 | -1.707391 | -1.328288 | -0.375574 |
| 6  | 6  | 0 | -2.733642 | -2.108105 | -0.906663 |
| 7  | 1  | 0 | -3.457323 | -3.186169 | -2.622115 |
| 8  | 1  | 0 | -1.477684 | -2.625839 | -4.015626 |
| 9  | 1  | 0 | 0.332797  | -1.228781 | -3.088283 |
| 10 | 1  | 0 | -1.772546 | -0.960441 | 0.641590  |
| 11 | 1  | 0 | -3.597352 | -2.344028 | -0.292916 |
| 12 | 6  | 0 | 0.565969  | -0.223581 | -0.583057 |
| 13 | 8  | 0 | 0.168890  | 0.261692  | 0.679227  |
| 14 | 6  | 0 | 1.822651  | -1.073438 | -0.464196 |
| 15 | 1  | 0 | 1.613657  | -1.893861 | 0.228866  |
| 16 | 1  | 0 | 2.077442  | -1.493654 | -1.438606 |
| 17 | 1  | 0 | 2.664673  | -0.483242 | -0.099077 |
| 18 | 5  | 0 | 0.773112  | 1.068038  | 1.563390  |
| 19 | 17 | 0 | 2.354444  | 1.809309  | 1.353040  |
| 20 | 17 | 0 | 0.909440  | 1.192441  | -1.678106 |

21 17 0 -0.108403 1.374342 3.057772
